# Supplementary material
Source: publisher site journal article supplement (https://www.dovepress.com/get_supplementary_file.php?f=299190.xlsx)
Supplement: Supplementary file 1 [file get_supplementary_file.php]

## Sheet: Sheet1
TargetScan miRNA predictions
CircRNA	CircRNA (Top) - miRNA (Bottom) pairing	Site Type	CircRNA Start	CircRNA End	3' pairing	local AU	position	TA	SPS	context+ score	context+ score percentile
Mirbase ID
hsa_circ_0000284 (5' ... 3')	CAAGGUCAAAUAGAA--GUGAGCAU	7mer-m8	726	732	-0.016	-0.076	-0.01	-0.001	-0.038	-0.261	97
	|||| |||||||
hsa-miR-1178 (3' ... 5')	GAUCCCUUCUUGUCACUCGUU
hsa_circ_0000284 (5' ... 3')	UUUGUACGAGCUUAUGAAUGCUU	7mer-m8	789	795	0.021	-0.062	-0.019	-0.001	0.014	-0.167	94
	|||||||
hsa-miR-1179 (3' ... 5')	GGUUGGUUACUUUCUUACGAA
hsa_circ_0000284 (5' ... 3')	AAGGGUAGUGCUUUUCAGACAAA	7mer-1a	189	195	0.001	-0.011	-0.029	-0.001	-0.015	-0.129	85
	||||||
hsa-miR-1231 (3' ... 5')	CGUCGACAGGCGGGUCUGUG
hsa_circ_0000284 (5' ... 3')	AAACCAACAUGGGAAAUCCAGUG	7mer-m8	481	487	0.003	-0.011	0.006	-0.012	-0.002	-0.136	85
	|||||||
hsa-miR-1243 (3' ... 5')	GUGAGGAUAUUAACUAGGUCAA
hsa_circ_0000284 (5' ... 3')	CUUAUGAAUGCUUUCAGCACCGU	7mer-m8	799	805	0.021	-0.037	-0.02	-0.081	-0.063	-0.3	87
	|||||||
hsa-miR-1250 (3' ... 5')	UUUCCGGUGUAGGUCGUGGCA
hsa_circ_0000284 (5' ... 3')	CAUAUUAGCAAGGCUCAGUACUG	7mer-m8	746	752	0.012	-0.033	-0.013	-0.024	0.012	-0.166	91
	|||||||
hsa-miR-1278 (3' ... 5')	UAUCUACUAUACGUGUCAUGAU
hsa_circ_0000284 (5' ... 3')	CUCAGUCAAGUGCCUUUUGUAGU	7mer-m8	61	67	0.012	-0.013	-0.053	0.01	0.066	-0.098	94
	|||||||
hsa-miR-1283 (3' ... 5')	UCUUUCGCGAAAGGAAACAUCU
hsa_circ_0000284 (5' ... 3')	ACUGCACUGAAAAAAUUGAAAAG	7mer-1a	939	945	0.004	-0.006	-0.033	0.037	0.078	0.006	87
	||||||
hsa-miR-1305 (3' ... 5')	AGAGAGGGUAAUCUCAACUUUU
hsa_circ_0000284 (5' ... 3')	UUCAUGCUGAUCUCAAGCCAGAG	7mer-1a	973	979	0.001	0.002	-0.037	0.016	-0.063	-0.155	85
	||||||
hsa-miR-149 (3' ... 5')	CCCUCACUUCUGUGCCUCGGUCU
hsa_circ_0000284 (5' ... 3')	UUCUUAUGCCCGUCAAGGUCAAA	7mer-1a	713	719	0.004	0.006	-0.008	-0.023	-0.031	-0.126	85
	||||||
hsa-miR-192 (3' ... 5')	CCGACAGUUAAGUAUCCAGUC
hsa_circ_0000284 (5' ... 3')	UUCUUAUGCCCGUCAAGGUCAAA	7mer-1a	713	719	0.004	0.006	-0.008	-0.023	-0.031	-0.126	85
	||||||
hsa-miR-215 (3' ... 5')	CAGACAGUUAAGUAUCCAGUA
hsa_circ_0000284 (5' ... 3')	CAUGCUGAUCUCAAGCCAGAGAA	7mer-1a	975	981	0.001	-0.026	-0.037	0.026	-0.048	-0.158	89
	||||||
hsa-miR-326 (3' ... 5')	GACCUCCUUCCCGGGUCUCC
hsa_circ_0000284 (5' ... 3')	CAUGCUGAUCUCAAGCCAGAGAA	7mer-1a	975	981	0.001	-0.026	-0.037	0.026	-0.048	-0.158	89
	||||||
hsa-miR-330-5p (3' ... 5')	CGGAUUCUGUGUCCGGGUCUCU
hsa_circ_0000284 (5' ... 3')	UGGCCAGGUAGUUAAAUGCUGGA	8mer-1a	641	648	0.024	-0.047	0	0.019	-0.06	-0.311	97
	|||||||
hsa-miR-338-3p (3' ... 5')	GUUGUUUUAGUGACUACGACCU
hsa_circ_0000284 (5' ... 3')	UGUUUAGUCUUUGAGAUGCUGGA	8mer-1a	831	838	0.003	-0.005	-0.048	0.019	-0.06	-0.338	98
	|||||||
hsa-miR-338-3p (3' ... 5')	GUUGUUUUAGUGACUACGACCU
hsa_circ_0000284 (5' ... 3')	GUCUUUGAGAUGCUGGAACAAAA	7mer-1a	837	843	-0.006	-0.015	-0.022	-0.009	0.038	-0.088	93
	||| ||||||
hsa-miR-375 (3' ... 5')	AGUGCGCUCGGCUUGCUUGUUU
hsa_circ_0000284 (5' ... 3')	CAAGUGCCUUUUGUAGUGUGAAG	7mer-1a	67	73	-0.009	-0.002	-0.043	0.015	-0.019	-0.132	91
	||||||| ||||||
hsa-miR-377 (3' ... 5')	UGUUUUCAACGGAAA----CACACUA
hsa_circ_0000284 (5' ... 3')	AUAGACCUCGAGGACACAACUUU	7mer-m8	223	229	0.003	0.004	-0.03	-0.011	0.056	-0.098	88
	|||||||
hsa-miR-382 (3' ... 5')	GCUUAGGUGGUGCUUGUUGAAG
hsa_circ_0000284 (5' ... 3')	UGCUGGAACAAAACUUGUAUGAC	7mer-m8	847	853	-0.007	-0.057	-0.027	-0.007	0.04	-0.178	94
	|||||||
hsa-miR-485-3p (3' ... 5')	UCUCUCCUCUCGGCACAUACUG
hsa_circ_0000284 (5' ... 3')	CAUGAAGUCUUAUGCUCCAUGAA	7mer-1a	576	582	0.001	-0.024	0.007	-0.008	-0.016	-0.114	86
	||||||
hsa-miR-490-5p (3' ... 5')	UGGGUGGACCUCUAGGUACC
hsa_circ_0000284 (5' ... 3')	CAUGUAUCAAAGACUGUUUGUUC	7mer-m8	1065	1071	0.003	-0.034	-0.058	0.038	0.071	-0.1	97
	|||||||
hsa-miR-495 (3' ... 5')	UUCUUCACGUGGUACAAACAAA
hsa_circ_0000284 (5' ... 3')	UUUGUUCAACAUAUCUACAAUCU	7mer-m8	1081	1087	-0.016	0.003	-0.06	-0.026	0.056	-0.163	96
	||| |||||||
hsa-miR-508-3p (3' ... 5')	AGAUGAGGUUUUCCG-AUGUUAGU
hsa_circ_0000284 (5' ... 3')	UUUCUGAAACAAAAUAAAUUUAG	7mer-1a	870	876	-0.009	0.004	-0.026	0.042	0.144	0.081	85
	|||| ||||||
hsa-miR-513a-3p (3' ... 5')	GGAAGAGUCUUUCCAC--UUUAAAU
hsa_circ_0000284 (5' ... 3')	GCUACAAAGGUCAUAGCAGCUCA	8mer-1a	288	295	-0.008	0.024	-0.042	0.017	-0.126	-0.382	98
	|||||||
hsa-miR-558 (3' ... 5')	UAAAACCAUGUCGUCGAGU
hsa_circ_0000284 (5' ... 3')	CUAUGUGAAUGGUAGAAACUUUG	7mer-m8	146	152	0.003	0.024	-0.041	0.031	0.11	0.007	88
	|||||||
hsa-miR-561 (3' ... 5')	UGAAGUUCCUAGAAUUUGAAAC
hsa_circ_0000284 (5' ... 3')	GCUGGAAAAGAGGGACAAAUGAA	8mer-1a	658	665	0.024	-0.025	-0.004	0.067	0.105	-0.08	96
	|||||||
hsa-miR-579 (3' ... 5')	UUAGCGCCAAAUAUGGUUUACUU
hsa_circ_0000284 (5' ... 3')	GUAGAAACUUUGGAAAUUCUCAU	7mer-m8	157	163	0.003	-0.016	-0.04	0.015	0.047	-0.111	95
	|||||||
hsa-miR-580 (3' ... 5')	GGAUUACUAAGUAGUAAGAGUU
hsa_circ_0000284 (5' ... 3')	UGCUUUCAGCACCGUAACCAUAC	7mer-m8	807	813	0.003	-0.01	-0.021	-0.02	0.046	-0.122	92
	|||||||
hsa-miR-584 (3' ... 5')	GAGUCAGGGUCCGUUUGGUAUU
hsa_circ_0000284 (5' ... 3')	UUAAUAGACCUCGAGGACACAAC	7mer-m8	220	226	0.003	0.005	-0.031	0.005	0.014	-0.124	94
	|||||||
hsa-miR-599 (3' ... 5')	CAAACUAUUUGACUGUGUUG
hsa_circ_0000284 (5' ... 3')	AUCAAAGACUGUUUGUUCAACAU	7mer-m8	1070	1076	-0.007	-0.028	-0.058	-0.005	0.053	-0.165	95
	|||||||
hsa-miR-653 (3' ... 5')	GUCAUCUCUAACAAAGUUGUG
hsa_circ_0000284 (5' ... 3')	UGAUUCGGCCCAUUCUUCAACAA	8mer-1a	910	917	0.003	0.069	-0.068	-0.006	0.08	-0.169	95
	|||||||
hsa-miR-653 (3' ... 5')	GUCAUCUCUAACAAAGUUGUG
